# Supplementary material for: Microbial-Driven Stabilisation of Archaeological Iron Artefacts
Source: MDPI journal article supplement (doi:10.3390/cmd2020015), 2021-06-04
Supplement: s1 [file s1]

# Microbial-Driven Stabilisation of Archaeological Iron Artefacts

Sarah James and Edith Joseph

Table S1: XRD mineral identification reference list from the ICSD database

| Name                                     | Reference                  |
|------------------------------------------|----------------------------|
| * Akaganeite                             | 98-002-8076                |
| ◇ Vivianite                              | 98-002-8396                |
| + Halite                                 | 98-011-6223                |
| • Iron Sulphide                          | 98-005-2389                |
| ■ Iron (III) Hydroxide Sulphate          | 98-007-9270                |
| ⊗ Iron Phosphate (V) Oxide Hydroxide     | 98-005-8179<br>98-005-8183 |
| x Magnetite                              | 98-004-0553<br>98-001-7265 |
| ⌘ Tetraphosphorus (V) oxide              | 98-000-4620                |
| Maghemite C                              | 98-004-0553<br>98-011-2548 |
| Iron Oxide Hydroxide Chloride            | 98-005-6434                |
| Iron(III) Oxide Chloride                 | 98-001-0001<br>98-004-7534 |
| Tetraphosphorus (V) oxide                | 98-000-4620                |
| Phosphoferrite                           | 98-0005-729                |
| Phosphorous Oxide                        | 98-004-8301                |
| Iron Chloride Tetrahydrate               | 98-00-2626                 |
| Dipotassium Diferro(III)hexastannate(IV) | 98-010-4071                |
| Calcium Iron Aluminium Silicate          | 98-002-8972                |
| Disodium Zinc Silicate                   | 98-001-0346                |
| Goethite                                 | 98-011-1239                |
